# Supplementary material for: Theoretical insights into the defect performance of the wide bandgap semiconductor BaS
Source: Royal Society of Chemistry journal article supplement (doi:10.1039/d3cp00240c), 2023-01-01
Supplement: d3cp00240c1.pdf [file d3cp00240c1.pdf]

## Supporting Information

### Theoretical Insights on the Defect Performance in Wide

### Bandgap Semiconductor BaS

Yu Chen<sup>a</sup>, S. W. Fan<sup>a,\*</sup> and G. Y. Gao<sup>b</sup>

<sup>a</sup> Hubei Engineering Research Center of Weak Magnetic-field Detection, Department of Physics, China Three Gorges University, Yichang, 443002, China

<sup>b</sup> School of Physics, Huazhong University of Science and Technology, Wuhan, 430074, China

\*E-mail: phyfsw@ctgu.edu.cn

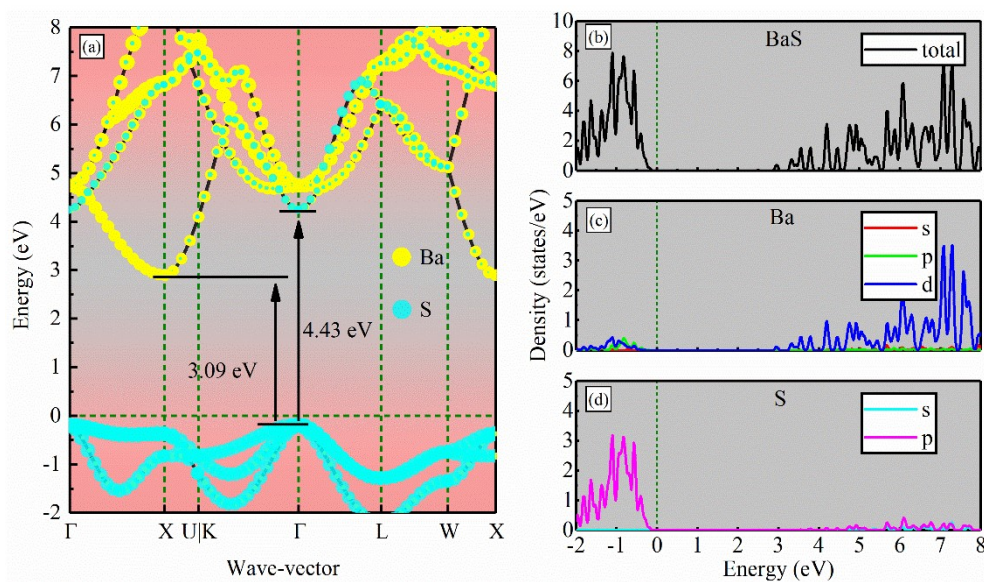

**Fig. S1** HSE06-calculated (a) projected band structure and (b) density of states of BaS are plotted.

The Fermi energy is set to 0 eV.

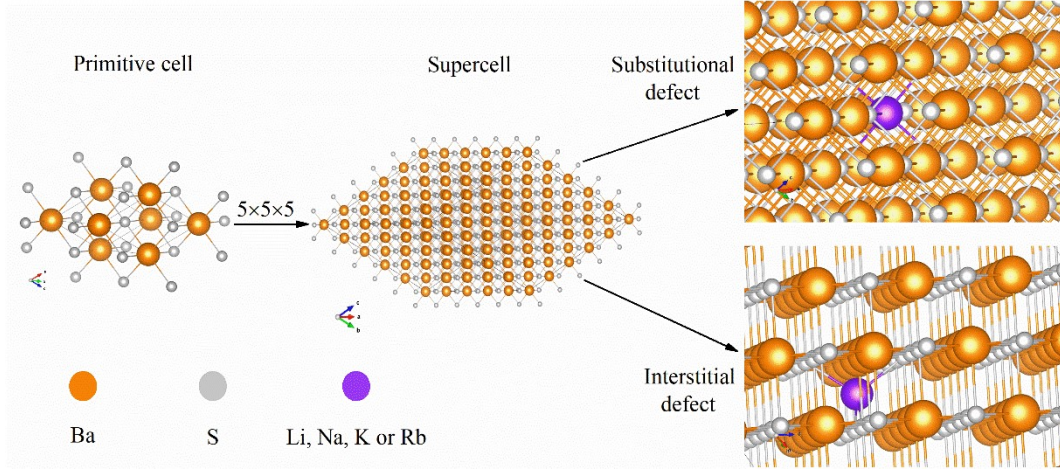

**Fig. S2** The construction process of defective structures is plotted, where Ba, S and impurities (Li, Na, K, and Rb) atoms are marked as orange, light grey, and purple, respectively.

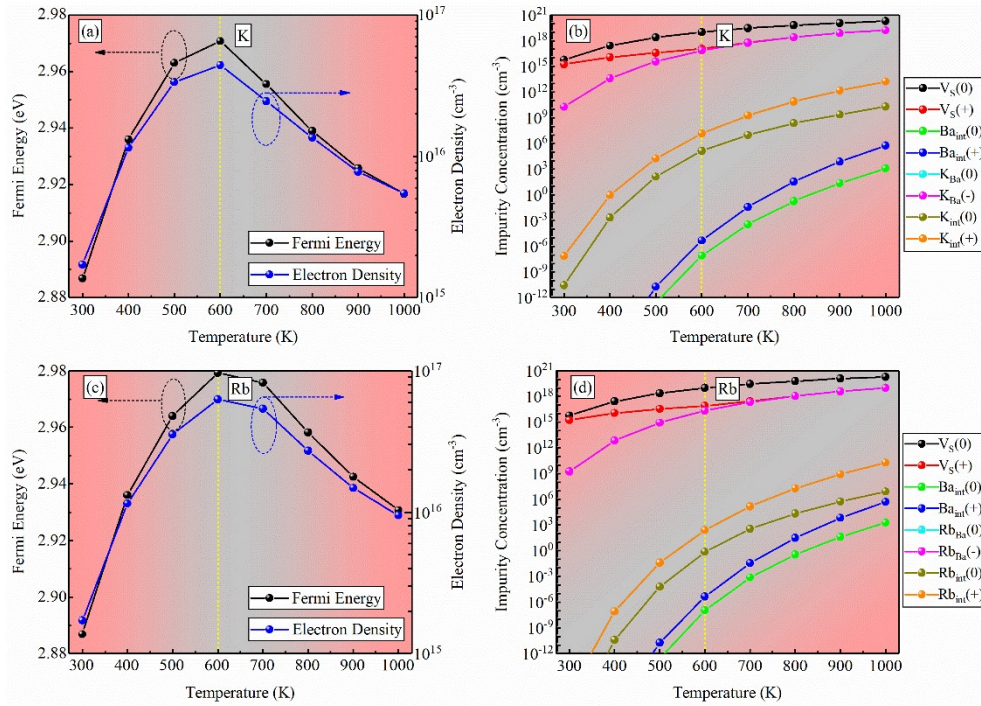

**Fig. S3** After quenching from different  $T_G$  to room temperature, (a) ((c)) the Fermi energy positions and electron density, as well as (b) ((d)) impurity concentrations for K (Rb)-doped BaS systems under Ba-rich growth conditions are depicted. The yellow dotted lines indicate the peak value where the Fermi energy and electron density reach maximum.

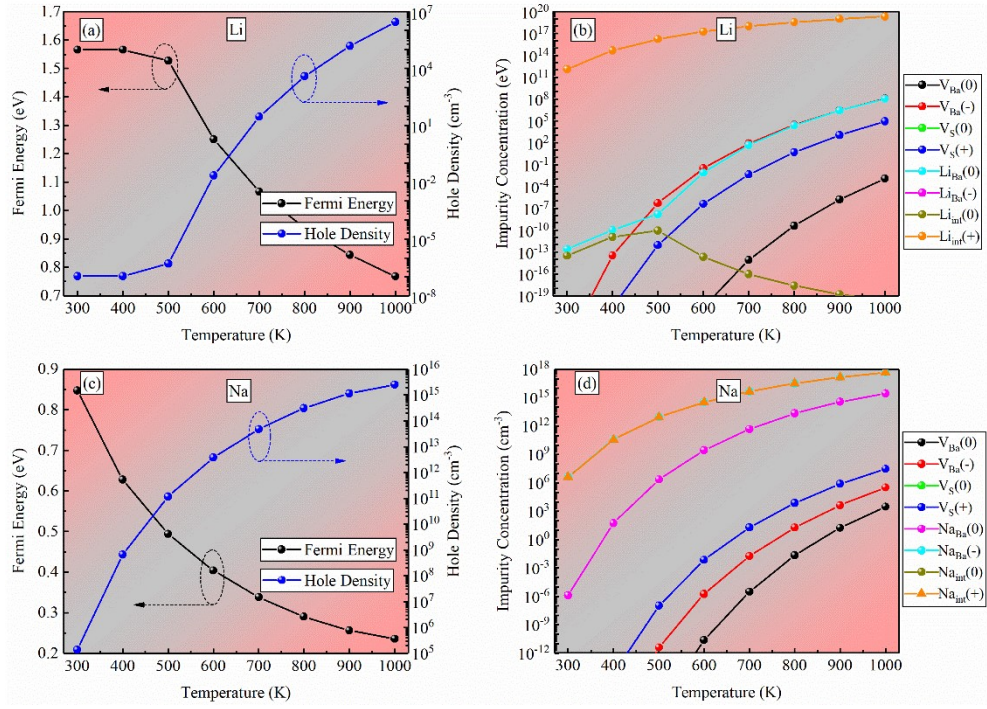

**Fig. S4** After quenching from different  $T_G$  to room temperature, (a) ((c)) the Fermi energy positions and hole density, as well as (b) ((d)) impurity concentrations in Li (Na)-doped BaS systems under S-rich growth conditions are depicted.
